P2599

Echo color doppler evaluation of renal hemodynamic during acute heart failure

A. Sacchi<sup>1</sup>, M. Galassi<sup>2</sup>, F. Brugioni<sup>1</sup>, B. Ricco<sup>1</sup>, F. Lami<sup>1</sup>, R. Messori<sup>1</sup>, M. Bortolotti<sup>2</sup>, G. Pinelli<sup>1</sup>, F. Turrini<sup>1</sup>

<sup>1</sup>Azienda Ospedaliero Universitaria, Modena, Italy; <sup>2</sup>Unit of Geriatrics - Department of Internal Medicine, Endocrinology, Metabolism and Geriatrics, Modena, Italy

**Background:** Acute heart failure (AHF) is often accompanied by impairment in renal function. A profound derangement of normal abdominal haemodynamic is always present during this clinical phase.  
**Methods:** 14 patients (6 F – mean age 80 – mean EF 0.39) admitted for acute heart failure underwent cardiac and renal Echo Doppler examination at day 1-3-5 of Hospital stay. Parameters of arterial and venous flow within cortical right kidney were recorded. Venous Doppler Profile (VDP) was classified as: continuous (C), pulsatile (P), biphasic (B) or monophasic (M) according to the growing degree of derangement. Arterial resistive index (RI) >0.8 was considered elevated. Correlation between renal hemodynamic (and its changes) with biohumoral and echo parameters was sought.  
**Outcome:** At day 1 VDP was M or B in 8 patients (57%) and in four (50%) of them dropped to C or P at day 5. RI was elevated in 8 patients at day 1

while only in 4 at day 5. VDP and RI were not related to EF or BNP values. One patient died before day 5, no other worsening heart failure episodes occurred. Two patients (14%) developed acute kidney injury but their VDP and RI were normal and did not change. Three patients (21%) did not improve their BNP (decrease >30%) but this was not associated with VDP or RI changes. Elevated derived pulmonary artery systolic pressure (>40 mmHg) was present in 6 out of 8 patients (75%) with M or B VDP and in all 4 patients with both elevated RI and M or B VDP.  
**Conclusions:** This is the first study exploring changes in renal hemodynamic by echo Doppler during AHF. With respect to previous studies among stable patients, our preliminary data shows a higher proportion of deranged renal venous and/or arterial pattern. After diuretic therapy a trend towards improvement in VDP was recorded. No clear association with other clinical and hemodynamic parameters seems evident.

| Venous Pattern    | Day 1      | Day 3    | Day 5    |
|-------------------|------------|----------|----------|
| Continuous        | 2          | 8        | 5        |
| Pulsatile         | 4          | 2        | 4        |
| Biphasic          | 2          | 1        | 2        |
| Monophasic        | 6          | 3        | 2        |
| Arterial RI >0.8  | 8          | 6        | 4        |
| BNP, pg/ml        | 1060±1180* | 372±281* | 424±213* |
| Creatinine, mg/dl | 1.4±0.6    | 1.5±0.6  | 1.3±0.6  |
| Hb, g/dl          | 12.1±2.3   | 12.3±3.6 | 13.2±2.3 |

\*p>0.05.
